# Supplementary material
Source: ML conference proceedings conference paper supplement (https://openaccess.thecvf.com/content/ICCV2023/html/Zheng_Multi-task_View_Synthesis_ICCV_2023_paper.html)
Supplement: Supplementary file 2 [file Zheng_Multi-task_View_Synthesis_ICCV_2023_supplemental.zip]

Archive with 2 entries (2 files):
- 02214_demo_video.mp4
- 02214_Supp.pdf
